# Supplementary material
Source: publisher site journal article supplement (https://www.dovepress.com/article/502321)
Supplement: Supplementary file 1 [file get_supplementary_file.php]

**Supplementary table 1 Chemical compound and ADME parameters of BD**

| **NO.** | **Compound** | **PubChem CID** | **ADMET-SOLUBLITY-level** | **ADMET-absorption-level** | **Herb** |
| --- | --- | --- | --- | --- | --- |
| ZQ1 | 5,7-Dihydroxy-2-(4-hydroxyphenyl)chroman-4-one | 932 | 3 | 0 | Civic aurantium |
| ZQ2 | Hesperetin | 72281 | 3 | 0 | Civic aurantium |
| ZQ3 | Marmin | 6450230 | 3 | 0 | Civic aurantium |
| ZQ4 | Nobiletin | 72344 | 2 | 0 | Civic aurantium |
| GC1 | (-)-Medicocarpin | 23724664 | 3 | 0 | Licorice |
| GC2 | (2S)-6-(2,4-dihydroxyphenyl)-2-(2-hydroxypropan-2-yl)-4-methoxy-2,3-dihydrofuro[3,2-g]chromen-7-one | 637112 | 2 | 0 | Licorice |
| GC3 | 1,3-Dihydroxy-8,9-dimethoxy-[1]benzofuro[3,2-c]chromen-6-one | 11602329 | 2 | 0 | Licorice |
| GC4 | 1,3-Dihydroxy-9-methoxy-[1]benzofuro[3,2-c]chromen-6-one | 11558452 | 2 | 0 | Licorice |
| GC5 | 18alpha-Hydroxyglycyrrhetic acid | 14189465 | 1 | 1 | Licorice |
| GC6 | 1-Methoxyphaseollidin | 480873 | 2 | 0 | Licorice |
| GC7 | 2-[(3R)-8,8-Dimethyl-3,4-dihydro-2H-pyrano[2,3-f]chromen-3-yl]-5-methoxyphenol | 9927807 | 2 | 0 | Licorice |
| GC8 | 3'-Hydroxy-4'-O-Methylglabridin | 15228662 | 2 | 0 | Licorice |
| GC9 | 3'-Methoxyglabridin | 5319439 | 2 | 0 | Licorice |
| GC10 | 5-Prenylbutein | 11267805 | 2 | 1 | Licorice |
| GC11 | 7,2',4'-Trihydroxy-5-Methoxy-3-phenylcouMarin | 25015742 | 3 | 0 | Licorice |
| GC12 | 7-Acetoxy-2-methylisoflavone | 268208 | 2 | 0 | Licorice |
| GC13 | 7-Hydroxy-4-(4-hydroxyphenyl)-6-(3-methylbut-2-enyl)chromen-2-one | 5318437 | 2 | 0 | Licorice |
| GC14 | 7-Methoxy-2-methylisoflavone | 354368 | 2 | 0 | Licorice |
| GC15 | Betulinic acid | 64971 | 1 | 2 | Licorice |
| GC16 | Calycosin | 5280448 | 3 | 0 | Licorice |
| GC17 | Eurycarpin A | 5317300 | 2 | 0 | Licorice |
| GC18 | Formononetin | 5280378 | 3 | 0 | Licorice |
| GC19 | Gancaonin A | 5317478 | 2 | 0 | Licorice |
| GC20 | Gancaonin B | 5317479 | 2 | 0 | Licorice |
| GC21 | Gancaonin G | 480780 | 2 | 0 | Licorice |
| GC22 | Gancaonin H | 5481949 | 2 | 1 | Licorice |
| GC23 | Gancaonin L | 14604077 | 2 | 1 | Licorice |
| GC24 | Gancaonin M | 14604078 | 2 | 0 | Licorice |
| GC25 | Gancaonin O | 14604081 | 2 | 1 | Licorice |
| GC26 | Glabranin | 124049 | 2 | 0 | Licorice |
| GC27 | Glabrene | 480774 | 2 | 0 | Licorice |
| GC28 | Glabridin | 124052 | 2 | 0 | Licorice |
| GC29 | Glabrone | 5317652 | 2 | 0 | Licorice |
| GC30 | Glepidotin A | 5281619 | 2 | 0 | Licorice |
| GC31 | Glepidotin B | 442411 | 2 | 0 | Licorice |
| GC32 | Glyasperin B | 480784 | 2 | 0 | Licorice |
| GC33 | Glyasperin C | 480859 | 2 | 0 | Licorice |
| GC34 | Glyasperin F | 392442 | 2 | 0 | Licorice |
| GC35 | Glycyrin | 480787 | 2 | 0 | Licorice |
| GC36 | Glycyrol | 5320083 | 1 | 1 | Licorice |
| GC37 | Glycyrrhiza flavonol A | 5317765 | 3 | 0 | Licorice |
| GC38 | Glypallichalcone | 5317768 | 3 | 0 | Licorice |
| GC39 | Glyuranolide | 195396 | 1 | 0 | Licorice |
| GC40 | Glyzaglabrin | 5317777 | 3 | 0 | Licorice |
| GC41 | Isobavachin | 193679 | 2 | 0 | Licorice |
| GC42 | Isoformononetin | 3764 | 3 | 0 | Licorice |
| GC43 | Isoglycyrol | 124050 | 1 | 0 | Licorice |
| GC44 | Isolicoflavonol | 5318585 | 2 | 0 | Licorice |
| GC45 | isorhamnetin | 5281654 | 3 | 0 | Licorice |
| GC46 | Isotrifoliol | 5318679 | 2 | 0 | Licorice |
| GC47 | kaempferol | 5280863 | 3 | 0 | Licorice |
| GC48 | Kanzonol B | 10881804 | 2 | 0 | Licorice |
| GC49 | Kanzonol F | 1.02E+08 | 1 | 0 | Licorice |
| GC50 | Kanzonol U | 10542808 | 2 | 0 | Licorice |
| GC51 | Kumatakenin | 5318869 | 3 | 0 | Licorice |
| GC52 | Licoagrocarpin | 15840593 | 2 | 0 | Licorice |
| GC53 | Licoagroisoflavone | 636883 | 2 | 0 | Licorice |
| GC54 | Licoarylcoumarin | 10090416 | 2 | 0 | Licorice |
| GC55 | Licochalcone A | 5318998 | 2 | 0 | Licorice |
| GC56 | Licochalcone B | 5318999 | 3 | 0 | Licorice |
| GC57 | licochalcone G | 49856081 | 2 | 0 | Licorice |
| GC58 | Licocoumarone | 503731 | 2 | 1 | Licorice |
| GC59 | licoisoflavanone | 392443 | 2 | 0 | Licorice |
| GC60 | Licoisoflavone A | 5281789 | 2 | 1 | Licorice |
| GC61 | Licoisoflavone B | 5481234 | 2 | 0 | Licorice |
| GC62 | Licopyranocoumarin | 122851 | 2 | 0 | Licorice |
| GC63 | Licoricone | 5319013 | 2 | 0 | Licorice |
| GC64 | Liquiritin | 503737 | 3 | 2 | Licorice |
| GC65 | Lupiwighteone | 5317480 | 2 | 0 | Licorice |
| GC66 | Maackiain | 91510 | 2 | 0 | Licorice |
| GC67 | Medicarpin | 336327 | 3 | 0 | Licorice |
| GC68 | Naringetol | 439246 | 3 | 0 | Licorice |
| GC69 | Odoratin | 13965473 | 3 | 0 | Licorice |
| GC70 | Phaseol | 44257530 | 2 | 0 | Licorice |
| GC71 | Phaseolinisoflavan | 4484952 | 2 | 0 | Licorice |
| GC72 | Quercetin | 5280343 | 3 | 1 | Licorice |
| GC73 | Quercetin 3,3'-dimethyl ether | 5316900 | 3 | 0 | Licorice |
| GC74 | Semilicoisoflavone B | 5481948 | 2 | 0 | Licorice |
| GC75 | Shinflavanone | 197678 | 1 | 0 | Licorice |
| GC76 | Shinpterocarpin | 10336244 | 2 | 0 | Licorice |
| GC77 | Sigmoidin B | 73205 | 2 | 1 | Licorice |
| GC78 | Vestitol | 92503 | 3 | 0 | Licorice |
| GC79 | Xambioona | 14769500 | 1 | 0 | Licorice |
| BX1 | (+)-Neocryptotanshinone | 389888 | 3 | 0 | Pinellia |
| BX2 | Baicalein | 5281605 | 3 | 0 | Pinellia |
| BX3 | Cavidine | 193148 | 2 | 0 | Pinellia |
| BX4 | Cyclo(L-tyrosyl-L-phenylalanyl) | 11438306 | 3 | 0 | Pinellia |
| CFL1 | 16alpha-Hydroxydehydrotrametenolic acid | 10743008 | 2 | 1 | Tuckahoe |
| CFL2 | Cerevisterol | 10181133 | 2 | 0 | Tuckahoe |
| CFL3 | Dehydroeburicoic acid | 15250826 | 1 | 2 | Tuckahoe |
| CFL4 | Dehydropachymic acid | 15226717 | 1 | 2 | Tuckahoe |
| CFL5 | Dehydrotumulosic acid | 15225964 | 2 | 1 | Tuckahoe |
| CFL6 | Ergosterol peroxide | 5351516 | 1 | 1 | Tuckahoe |
| CFL7 | Hederagenin | 73299 | 1 | 1 | Tuckahoe |
| CFL8 | Pachymic acid | 5484385 | 1 | 2 | Tuckahoe |
| CFL9 | Polyporenic acid C | 9805290 | 1 | 1 | Tuckahoe |
| CFL10 | Poricoic acid A | 5471851 | 2 | 2 | Tuckahoe |
| CFL11 | Poricoic acid B | 5471852 | 2 | 2 | Tuckahoe |
| JG1 | (+)-Epitaxifolin | 443758 | 3 | 1 | Platycodons |
| JG2 | Acacetin | 5280442 | 3 | 0 | Platycodons |
| JG3 | Luteolin | 5280445 | 3 | 0 | Platycodons |
| SG1 | anhydrobelachinal | 10742927 | 1 | 1 | Shegan |
| SG2 | belachinal | 10838654 | 2 | 1 | Shegan |
| SG3 | belamcandal | 101615675 | 2 | 2 | Shegan |
| SG4 | dihydrokaempferide | 586387 | 3 | 0 | Shegan |
| SG5 | Dinatin | 5281628 | 3 | 0 | Shegan |
| SG6 | epianhydrobelachinal | 10790466 | 1 | 1 | Shegan |
| SG7 | Iristectorigenin (9CI) | 5488781 | 3 | 0 | Shegan |
| SG8 | Iristectorigenin A | 5491637 | 3 | 0 | Shegan |
| SG9 | Irolone | 5281779 | 3 | 0 | Shegan |
| SG10 | isorhamnetin | 5281654 | 3 | 0 | Shegan |
| SG11 | luteolin | 5280445 | 3 | 0 | Shegan |
| SG12 | Mangiferolic acid | 45270099 | 1 | 2 | Shegan |
| SG13 | Rhamnazin | 5320945 | 3 | 0 | Shegan |
| NBZ1 | (3R,4R)-3,4-bis[(3,4-dimethoxyphenyl)methyl]oxolan-2-one | 384877 | 2 | 0 | Burdock |
| NBZ2 | kaempferol | 5280863 | 3 | 0 | Burdock |
| XR1 | (+)-catechin | 9064 | 3 | 0 | Almonds |
| XR2 | Diisooctyl succinate | 120074 | 2 | 1 | Almonds |
| XR3 | estrone | 5870 | 2 | 0 | Almonds |
| XR4 | Glabridin | 124052 | 2 | 0 | Almonds |
| XR5 | Glycyrol | 5320083 | 1 | 1 | Almonds |
| XR6 | Licochalcone B | 5318999 | 3 | 0 | Almonds |
| XR7 | liquiritin | 503737 | 3 | 2 | Almonds |
| XR8 | l-SPD | 6917970 | 2 | 0 | Almonds |
| XR9 | Machiline | 281691 | 3 | 0 | Almonds |
| XR10 | Mairin | 64971 | 1 | 2 | Almonds |
| XR11 | Phaseol | 44257530 | 2 | 0 | Almonds |
| MT1 | Ariskanin A | 5320068 | 2 | 0 | Mutong |
| MT2 | aristolochic acid A | 2236 | 2 | 0 | Mutong |
| MT3 | Aristolochic acid II | 108168 | 2 | 0 | Mutong |
| MT4 | hederagenin | 73299 | 1 | 1 | Mutong |
| KB1 | 1553-41-9 | 5282847 | 2 | 1 | Khumbu |
| KB2 | arachidonic acid | 444899 | 2 | 1 | Khumbu |
| KB3 | saringosterol | 14161394 | 1 | 1 | Khumbu |
| BL1 | ent-Epicatechin | 182232 | 3 | 0 | Areca |
| BL2 | Resivit | 71629 | 3 | 1 | Areca |
| BL3 | WLN: 6OVR BVO6 | 6786 | 2 | 1 | Areca |
| LYJ1 | fatty acid | 985 | 2 | 1 | Antelope horns |
| LYJ2 | glyceride | 57347407 | 3 | 0 | Antelope horns |
